# Supplementary material for: A fast and simple extraction method for analysing levoglucosan and its isomers in sediments by ion chromatography tandem mass spectrometry
Source: Royal Society of Chemistry journal article supplement (doi:10.1039/d3ay00278k), 2023-01-01
Supplement: d3ay00278k1.pdf [file d3ay00278k1.pdf]

**Supplementary Material:**

**A fast and simple extraction method for analysing levoglucosan and its isomers in sediments by ion chromatography tandem mass spectrometry**

Harrison Stevens <sup>a</sup>, Estrella Sanz Rodriguez <sup>b\*</sup>, Brett Paull <sup>b</sup>, Andrew R. Bowie <sup>c,d</sup>, Zanna Chase <sup>c</sup>, Leon

Barmuta <sup>a</sup>, Bernadette C. Proemse <sup>c,e</sup>

\*Corresponding author email: [Estrella.sanzrodriguez@utas.edu.au](mailto:Estrella.sanzrodriguez@utas.edu.au)

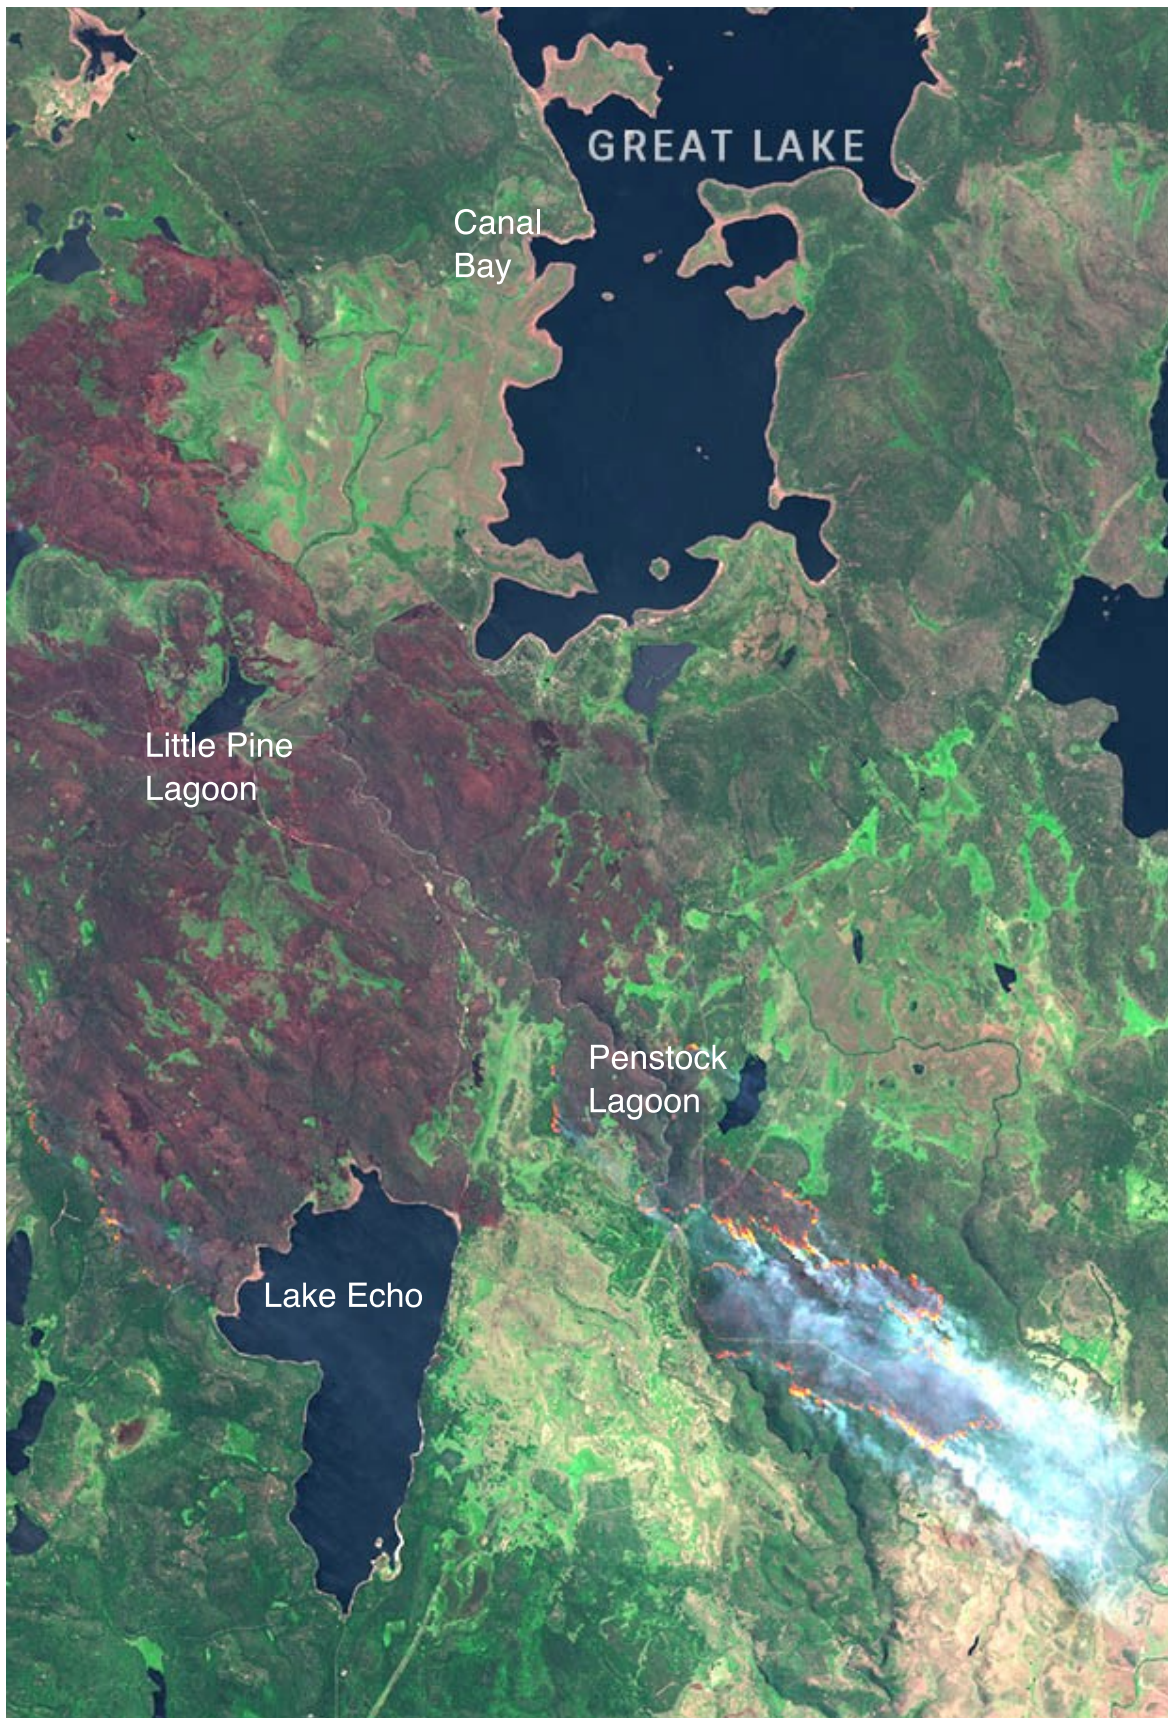

Figure 1 - 2019 Central Plateau fire showing ongoing fires and burned areas. Studied lakes are also shown. Satellite image from <https://www.abc.net.au/news/2019-02-02/great-lake-fire---jan-28/10770780?nw=0>.

Table 1 - Reported LEV, MAN, and GAL values for Urban dust CRM 1649.

| Author                   | Urban dust CRM 1649a |                     |                    | Urban dust CRM 1649b |                     |                    |
|--------------------------|----------------------|---------------------|--------------------|----------------------|---------------------|--------------------|
|                          | Levoglucofan         | Mannosan            | Galactosan         | Levoglucofan         | Mannosan            | Galactosan         |
| (Louchouart et al. 2009) | 160.5 ± 4.7<br>n = 4 | 17.3 ± 1.0<br>n = 4 | 5.0 ± 0.3<br>n = 4 | 160.5 ± 5.0<br>n = 4 | 16.7 ± 0.7<br>n = 4 | 4.8 ± 0.2<br>n = 4 |
| (Orasche et al. 2011)    | 165 ± 1.4            | 20.5 ± 1.0          | 10.8 ± 1.8         |                      |                     |                    |
| (Kirchgeorg et al. 2014) |                      |                     |                    | 168 ± 4.5            | 15.7 ± 0.7          | 5.0 ± 0.2          |

Table 2 - Highlighting the retention times and main ions generated from the injections of common sugars in the presence of LiCl.

| Sugar name | Retention time (minutes) | m/z | Main ions generated                  |
|------------|--------------------------|-----|--------------------------------------|
| Fucose     | 7.6                      | 171 | [M+Li] <sup>+</sup>                  |
|            |                          | 189 | [M+Li+H <sub>2</sub> O] <sup>+</sup> |
| Rhamnose   | 12.1                     | 171 | [M+Li] <sup>+</sup>                  |
|            |                          | 189 | [M+Li+H <sub>2</sub> O] <sup>+</sup> |
| Arabinose  | 12.6                     | 157 | [M+Li] <sup>+</sup>                  |
| Glucose    | 14.0                     | 205 | [M+Li+H <sub>2</sub> O] <sup>+</sup> |
|            |                          | 187 | [M+Li] <sup>+</sup>                  |
|            |                          | 169 | [M+Li-H <sub>2</sub> O] <sup>+</sup> |
| Mannose    | 14.1                     | 205 | [M+Li+H <sub>2</sub> O] <sup>+</sup> |
|            |                          | 187 | [M+Li] <sup>+</sup>                  |
|            |                          | 169 | [M+Li-H <sub>2</sub> O] <sup>+</sup> |
| Xylose     | 14.6                     | 157 | [M+Li] <sup>+</sup>                  |
| Ribose     | 15.9                     | 157 | [M+Li] <sup>+</sup>                  |
| Sucrose    | 20                       | 349 | [M+Li] <sup>+</sup>                  |
| Maltose    | unknown                  | n.a | n.a                                  |

Table 3 - Analytical performance of the repeat IC-TSQ-MS analysis of LPL\_11 sediment.

|                                    | LEV  | MAN  |
|------------------------------------|------|------|
| Reference sediment av. conc (µg/g) | 0.27 | 0.12 |
| Reference sediment (RSD %)         | 9.0  | 9.6  |
